# Supplementary material for: Between Innate and Adaptive Immune Responses: NKG2A, NKG2C, and CD8+ T Cell Recognition of HLA-E Restricted Self-Peptides Acquired in the Absence of HLA-Ia
Source: MDPI journal article supplement (doi:10.3390/ijms20061454), 2019-03-22
Supplement: s1 [file s1]

## Supplementary Figures

### **Between innate and adaptive immune responses: HLA-E restricted self-peptides acquired during an artificial hCMV infection determine the cell fate**

Wiebke C. Pump<sup>1\*</sup>, Thomas Kraemer<sup>1\*</sup>, Trevor Huyton<sup>2</sup>, Gia-Gia T. Hò<sup>1</sup>, Rainer Blasczyk<sup>1</sup>,  
Christina Bade-Döding<sup>1</sup>

\* these authors contributed equally to this work

<sup>1</sup>Institute for Transfusion Medicine, Hannover Medical School, Hannover, Germany

<sup>2</sup>Department of Cellular Logistics, Max Planck Institute for Biophysical Chemistry, Am  
Fassberg 11, 37077 Göttingen, Germany

*Supplementary Figures*

*Supplementary Fig. 1* Native PAGE of purified sNKG2/CD94 heterodimers

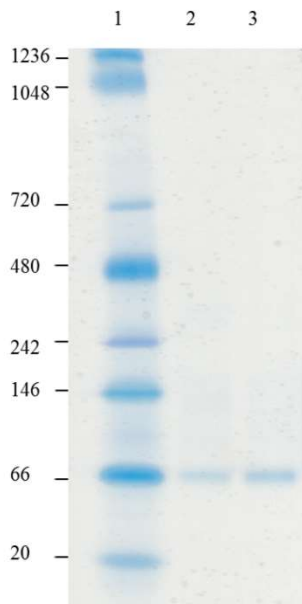

Lanes: 1, standard proteins sized in kDa at left; 2, sNKG2A/CD94; 3, sNKG2C/CD94. Purified sNKG2/CD94 heterodimers exhibit a molecular mass about ~ 66 kDa and no detectable monomers after purification. Proteins were detected with Coomassie blue G-250.

Supplementary Fig. 2 HLA-E surface expression on T2E cells

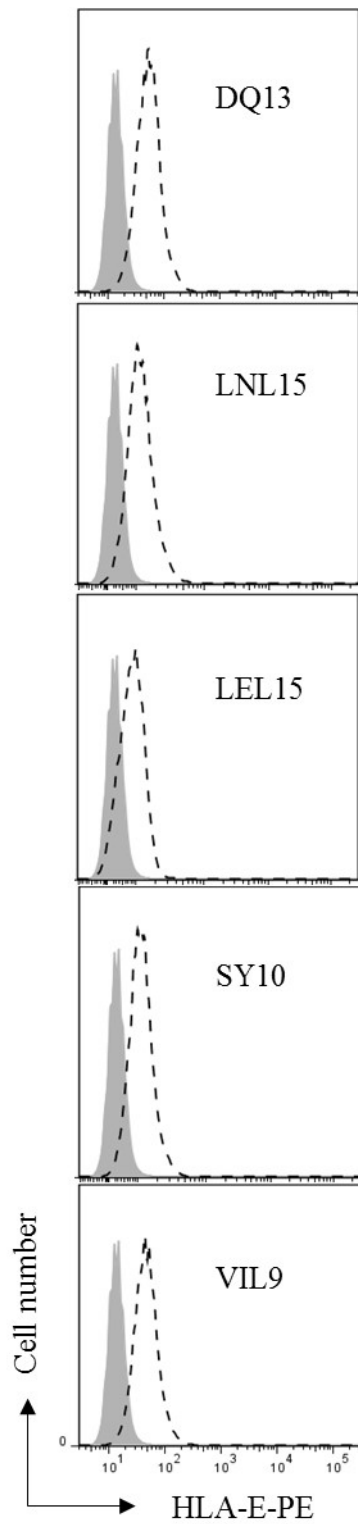

Histograms of HLA-E surface expression levels on T2E cells after incubation with the test peptides. HLA-E surface expression was detected after incubation with the anti-HLA-E 3D12-PE mab and differences in surface expression are indicated: filled grey: T2E cells without peptide, dashed graph: T2E cells with peptide

*Supplementary Fig. 3* NKG2/CD94 receptor binding to the p:HLA-E complexes

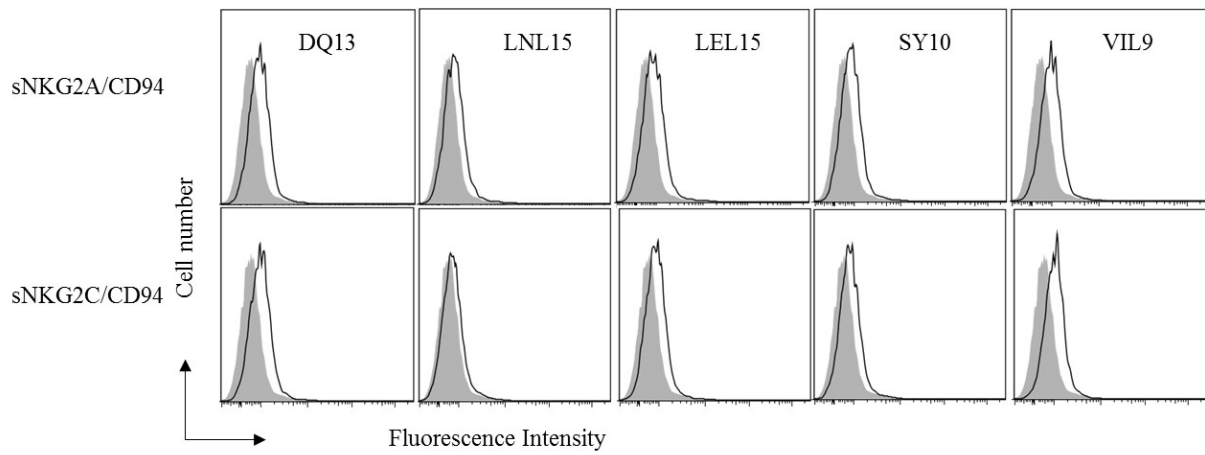

Receptor binding to T2E cells that were not pre-pulsed with peptide served as a negative control and are depicted by the filled grey graph and binding to T2E cells with peptide is indicated by the black graph.

Supplementary Fig. 4 Gating strategy for determination of CD8<sup>+</sup> T cell proliferation and phenotype.

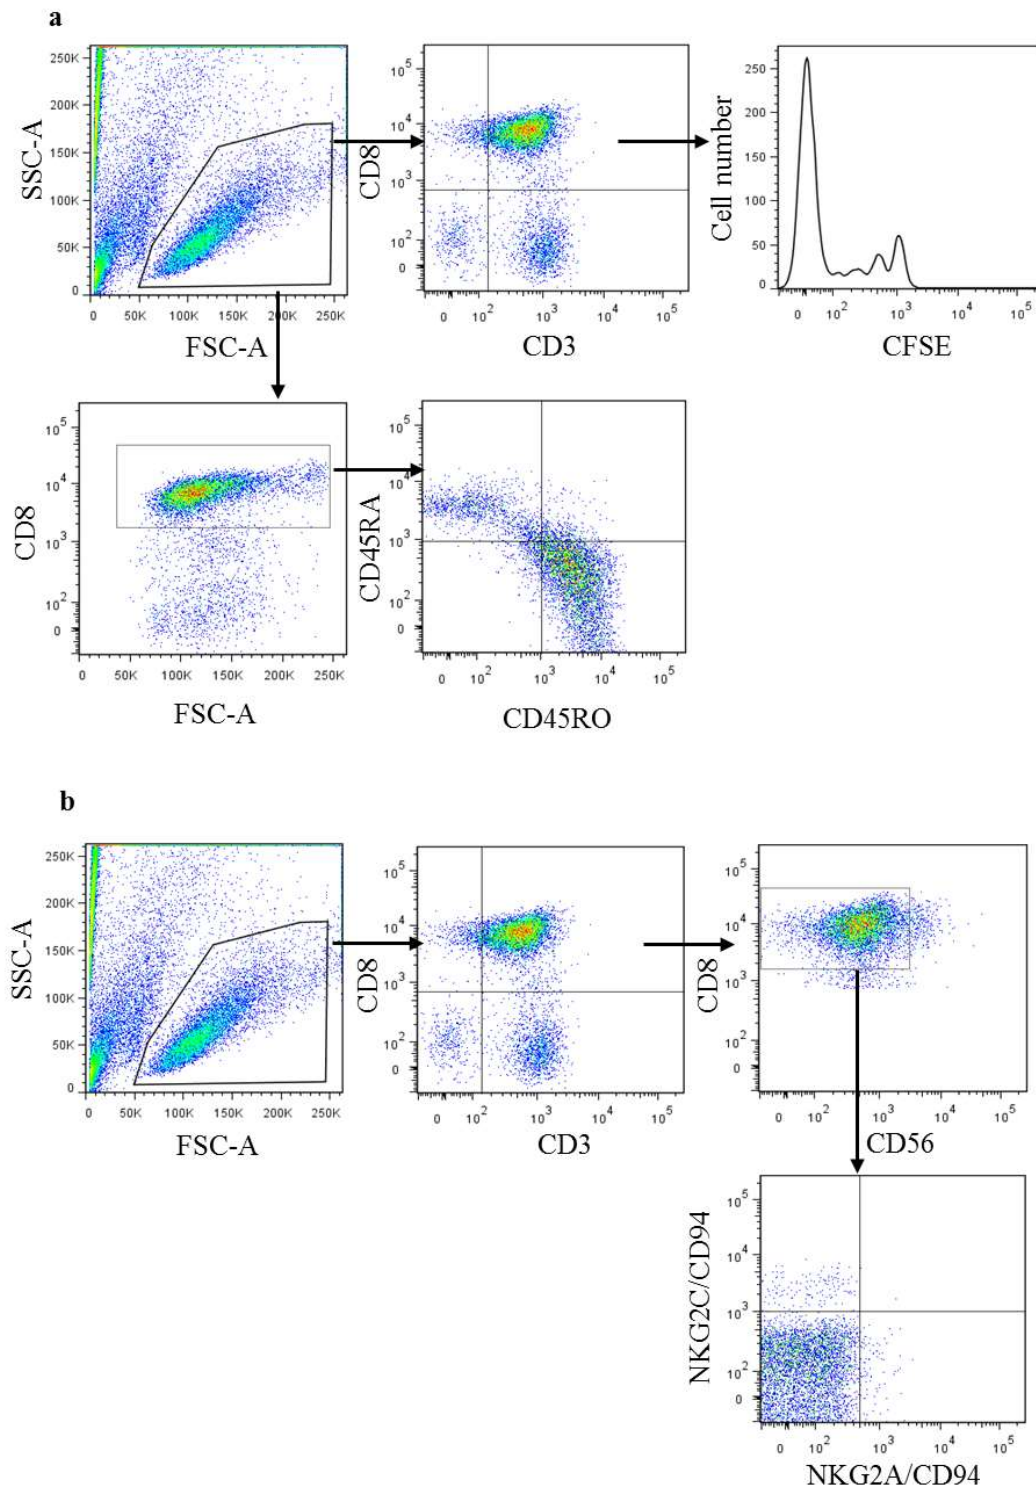

a) Proliferated CD8<sup>+</sup> T cells were first gated on live cells (FSC-A versus SSC-A), followed by identification of CD3<sup>+</sup>CD8<sup>+</sup> T cells (CD3 versus CD8). Proliferation of CD8<sup>+</sup> T cells was analyzed by CFSE dilution. Subgating from live cells to identify CD8<sup>+</sup> T cells (FSC-A versus CD8) leads to the determination of CD45RA and CD45RO phenotype of CD8<sup>+</sup> T cells (CD45RO versus CD45RA). b) Gating from live cells to identify CD3<sup>+</sup>CD8<sup>+</sup> T cells. CD3<sup>+</sup>CD8<sup>+</sup> T cells were strictly gated on CD56<sup>-</sup> cells and NKG2A/CD94 and NKG2C/CD94 phenotype of CD8<sup>+</sup> T cells were determined (NKG2A/CD94 versus NKG2C/CD94).

Supplementary Fig. 5 Live/Dead discrimination of proliferated CD8<sup>+</sup> T cells.

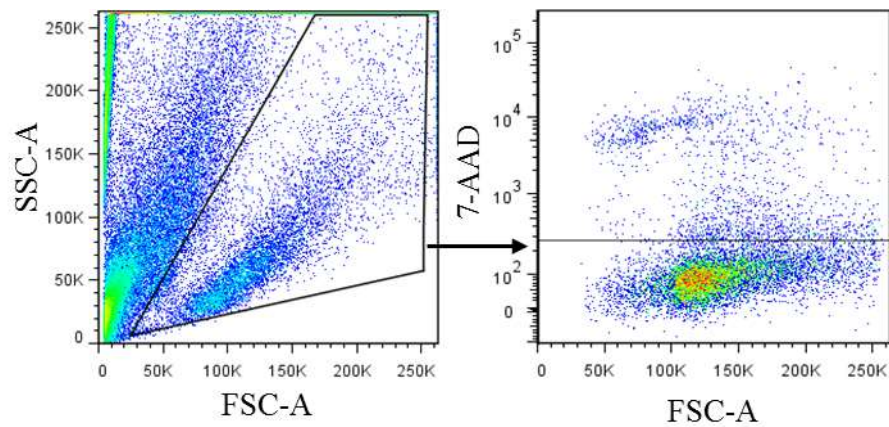

Gating on live cells (FSC-A versus SSC-A) was verified by 7-AAD staining (FSC-A versus 7-AAD) that represents the subgated population to determine the CD3<sup>+</sup>CD8<sup>+</sup> population.
